# Supplementary material for: ClusterMap: compare multiple single cell RNA-Seq datasets across different experimental conditions
Source: Oxford University Press journal article supplement (doi:10.1093/bioinformatics/btz024), 2019-01-11
Supplement: bioinformatics_35_17_3038_s6.pdf [file bioinformatics_35_17_3038_s6.pdf]

## SUPPLEMENTARY DATA

### Figure S1

Simulated dendrogram of four samples. A. Simulated dendrogram tree with four samples and 10 subgroups for each sample. B-C. Purity tree cut results for the simulated tree at edge cutoffs of 0.1 and 0.2. D. Diagram of the separability calculation.

### Figure S2

A. Simulated dendrogram tree with ten samples and 10 subgroups for each sample. B. Purity tree cut results for the simulated tree at edge cutoffs of 0.2. C. ClusterMap results for the T cell sub-types across 12 patients. The cell sub-types are pre-defined in the original study and shown as the names of sub-groups. The purity tree cut results are shown in Table S1.

### Figure S3

A-B. Feature plot for identifying cell types. The known markers for basal cells are Krt14, Acta2, Myl9, Sparc, Mylk, and Cxcl14. Luminal cells express Elf5, Prlr, Areg, Ly6d, Stc2, Krt19, and mature luminal express Pgr, Prlr, Cited1, Esrrb, and Cxcl15 (15). C-D. Gene ontology and pathway analysis for new marker genes of groups in combined samples (Figure 4C) using Metascape. C. luminal progenitors groups 1 and 11. D. Basal groups 3 and 7.

### Figure S4

CCA and scmap analysis and clustering for epithelial cell datasets as in Figure 3, 4. A. t-SNE plot of clustered cells after CCA analysis. B. t-SNE plot with cells colored by sample after CCA analysis. C. Feature plot for identifying cell types after CCA analysis. D. t-SNE plot of CCA analysis. Cells of group 2 in estrus, defined as in Figure 4B are highlighted in green. E. scmap analysis that map cells in estrus to the sub-groups in diestrus at threshold 0.5 (left) and 0.7 (right). Cells are colored the same as their assigned sub-groups in Fig. 3A. F. scmap analysis that map cells in diestrus to the sub-groups in estrus at threshold 0.5. Cells are colored the same as their assigned sub-groups in Fig. 3B.

### Figure S5

A. Pre-analysis for immune stimulated datasets. B. Circos plot of matched sub groups. C. Re-colored t-SNE plot based on the matching results of ClusterMap. D. scmap analysis result that map the cells in control sample to the sub-groups in stimulated sample at threshold 0.3. Cells are colored the same as their assigned sub-groups in A (right). E-F. Feature plot for identifying cell types.

### Figure S6

ClusterMap analysis for the PBMC replicates datasets. A. Pre-analysis of PBMC 4K. B. Pre-analysis of PBMC 8K. C. Heat map of marker genes. D. Dendrogram of the hierarchical clustering of marker genes. E. Circos plot of the matched subgroups. F. ClusterMap results.

### Figure S7

A-B. Re-colored t-SNE plot based on matching results for control and stimulated conditions. C. Re-colored t-SNE plot based on matching results for the combined dataset. D. t-SNE plot with cells colored by sample. E-F. Feature plots to identify cell types.

### Figure S8

Compare brain cell dataset with epithelial dataset. A. Pre-analysis of brain cell dataset. B-C ClusterMap results that match brain cell sub-groups with the sub-groups in estrus phase of epithelial dataset (Fig. 3B). D. ClusterMap results that match brain cells with fake estrus dataset, in which any overlapped marker genes between the two datasets were removed.

### Figure S9

A,C. ClusterMap results between two patients of T cell sub-types. Only CD4 and CD8 T cells and the sub-types with more than 20 cells in a patient were used. B. Pre-defined T cell sub-types as in the original publication. The figure was downloaded from Zhang et al., 2018.

### Table S1

The purity tree cut results of dendrogram shown in Fig. S2C.

Figure S1

A

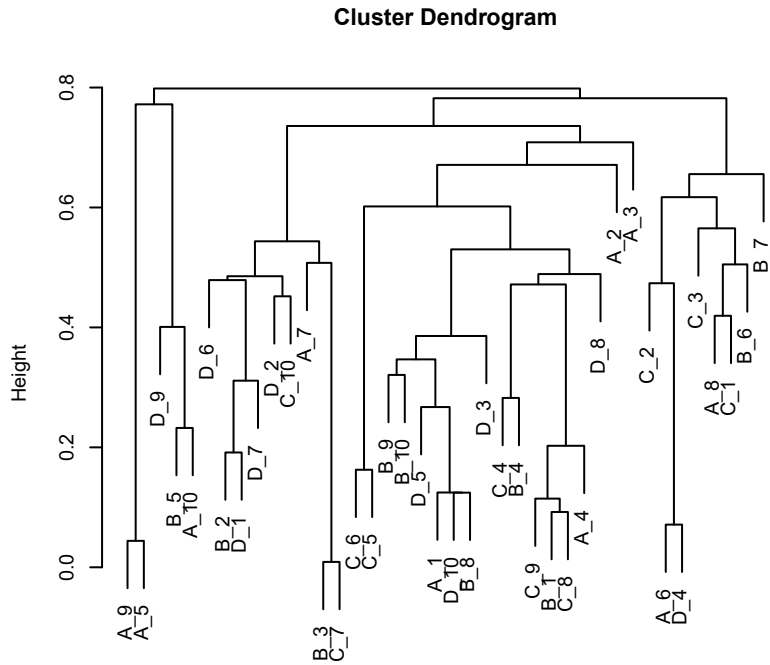

B

edge\_cutoff = 0.1

|    | A       | B        | C       | D    | similarity | regroup |
|----|---------|----------|---------|------|------------|---------|
| 1  | NA      | B_3      | C_7     | NA   | 0.99       | 1       |
| 2  | A_9;A_5 | NA       | NA      | NA   | 0.96       | 2       |
| 3  | A_6     | NA       | NA      | D_4  | 0.93       | 3       |
| 4  | A_1     | B_8      | NA      | D_10 | 0.88       | 4       |
| 5  | NA      | NA       | C_6;C_5 | NA   | 0.84       | 5       |
| 6  | NA      | B_2      | NA      | D_1  | 0.81       | 6       |
| 7  | A_4     | B_1      | C_9;C_8 | NA   | 0.8        | 7       |
| 8  | A_10    | B_5      | NA      | NA   | 0.77       | 8       |
| 9  | NA      | B_4      | C_4     | NA   | 0.72       | 9       |
| 10 | NA      | B_9;B_10 | NA      | NA   | 0.68       | 10      |
| 11 | NA      | NA       | C_10    | D_2  | 0.55       | 11      |
| 12 | A_8     | B_6      | C_3;C_1 | NA   | 0.43       | 12      |
| 13 | NA      | NA       | NA      | D_9  | NA         | 13      |
| 14 | NA      | NA       | NA      | D_6  | NA         | 14      |
| 15 | NA      | NA       | NA      | D_7  | NA         | 15      |
| 16 | A_7     | NA       | NA      | NA   | NA         | 16      |
| 17 | NA      | NA       | NA      | D_5  | NA         | 17      |
| 18 | NA      | NA       | NA      | D_3  | NA         | 18      |
| 19 | NA      | NA       | NA      | D_8  | NA         | 19      |
| 20 | A_2     | NA       | NA      | NA   | NA         | 20      |
| 21 | A_3     | NA       | NA      | NA   | NA         | 21      |
| 22 | NA      | NA       | C_2     | NA   | NA         | 22      |
| 23 | NA      | B_7      | NA      | NA   | NA         | 23      |

C

edge\_cutoff = 0.2

|    | A       | B            | C       | D               | similarity | regroup |
|----|---------|--------------|---------|-----------------|------------|---------|
| 1  | NA      | B_3          | C_7     | NA              | 0.99       | 1       |
| 2  | A_9;A_5 | NA           | NA      | NA              | 0.96       | 2       |
| 3  | A_6     | NA           | NA      | D_4             | 0.93       | 3       |
| 4  | NA      | NA           | C_6;C_5 | NA              | 0.84       | 4       |
| 5  | A_4     | B_1          | C_9;C_8 | NA              | 0.8        | 5       |
| 6  | NA      | B_4          | C_4     | NA              | 0.72       | 6       |
| 7  | A_1     | B_9;B_10;B_8 | NA      | D_5;D_10;D_3    | 0.61       | 7       |
| 8  | A_10    | B_5          | NA      | D_9             | 0.6        | 8       |
| 9  | NA      | B_2          | C_10    | D_6;D_1;D_7;D_2 | 0.51       | 9       |
| 10 | A_8     | B_6          | C_3;C_1 | NA              | 0.43       | 10      |
| 11 | A_7     | NA           | NA      | NA              | NA         | 11      |
| 12 | NA      | NA           | NA      | D_8             | NA         | 12      |
| 13 | A_2     | NA           | NA      | NA              | NA         | 13      |
| 14 | A_3     | NA           | NA      | NA              | NA         | 14      |
| 15 | NA      | NA           | C_2     | NA              | NA         | 15      |
| 16 | NA      | B_7          | NA      | NA              | NA         | 16      |

D

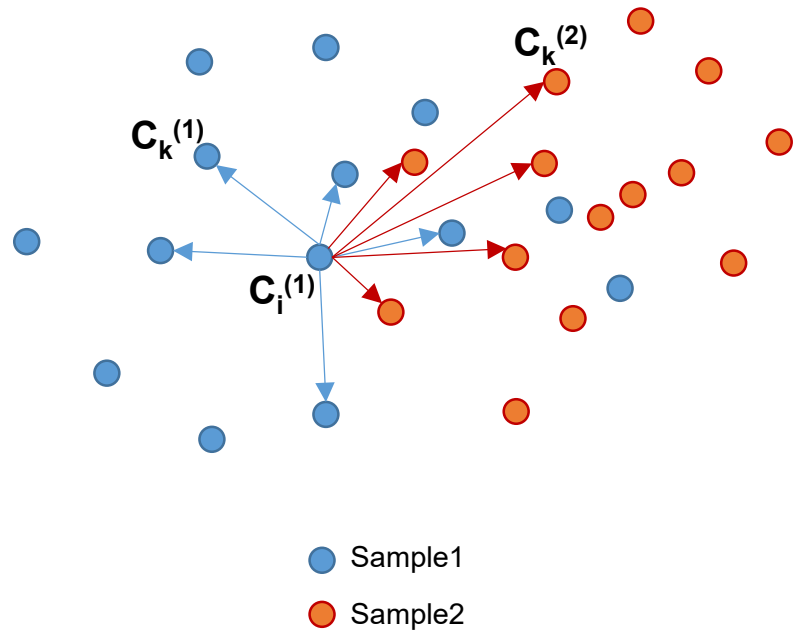

Figure S2

A

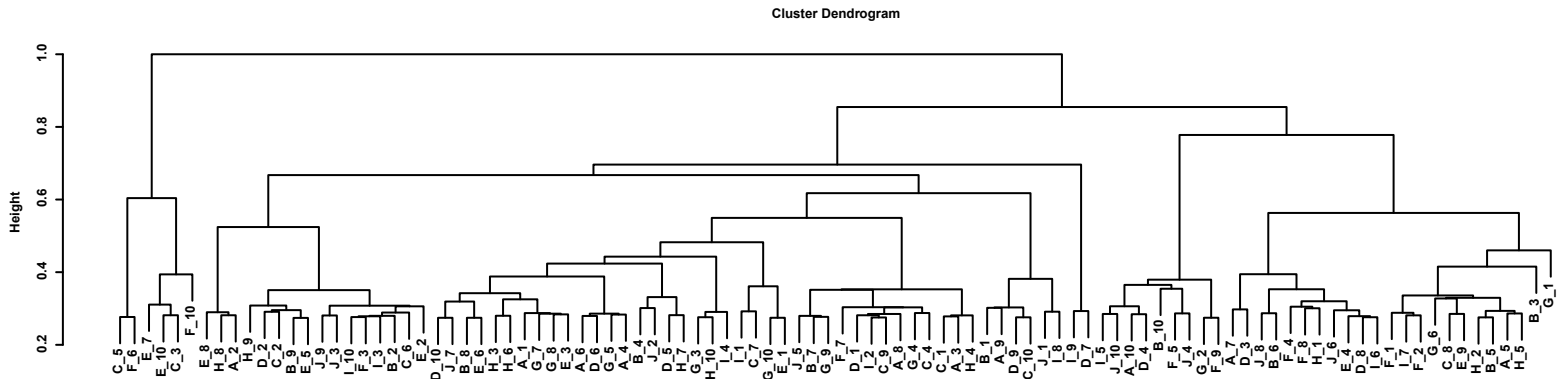

B

| A       | B           | C           | D       | E        | F               | G       | H           | I        | J        | similarity | regroup |
|---------|-------------|-------------|---------|----------|-----------------|---------|-------------|----------|----------|------------|---------|
|         |             | C_5         |         |          | F_6             |         |             |          |          | 0.72       | 1       |
|         |             |             | D_7     |          |                 |         |             | I_9      |          | 0.71       | 2       |
| A_2     |             |             |         | E_8      |                 |         | H_8         |          |          | 0.71       | 3       |
| A_6;A_4 |             |             | D_6     |          |                 | G_3     | H_10        | I_4      |          | 0.71       | 4       |
|         | B_4         |             | D_5     |          |                 |         | H_7         |          | J_2      | 0.67       | 6       |
| A_1     | B_8         |             | D_10    | E_6;E_3  |                 | G_7;G_8 | H_3;H_6     |          | J_7      | 0.66       | 7       |
| A_8;A_3 | B_7         | C_9;C_4;C_1 | D_1     |          | F_7             | G_9;G_4 | H_4         | I_2      | J_5      | 0.65       | 8       |
|         | B_9;B_2     | C_2;C_6     | D_2     | E_5;E_2  | F_3             |         | H_9         | I_10;I_3 | J_9;J_3  | 0.65       | 9       |
|         |             | C_7         |         | E_1      |                 | G_10    |             | I_1      |          | 0.64       | 10      |
| A_10    | B_10        |             | D_4     |          | F_5;F_9         | G_2     |             | I_5      | J_10;J_4 | 0.62       | 11      |
| A_9     | B_1         | C_10        | D_9     |          |                 |         |             | I_8      | J_1      | 0.62       | 12      |
|         |             | C_3         |         | E_7;E_10 | F_10            |         |             |          |          | 0.61       | 13      |
| A_7;A_5 | B_6;B_5;B_3 | C_8         | D_3;D_8 | E_4;E_9  | F_4;F_8;F_1;F_2 | G_6;G_1 | H_1;H_2;H_5 | I_6;I_7  | J_8;J_6  | 0.44       | 14      |

C

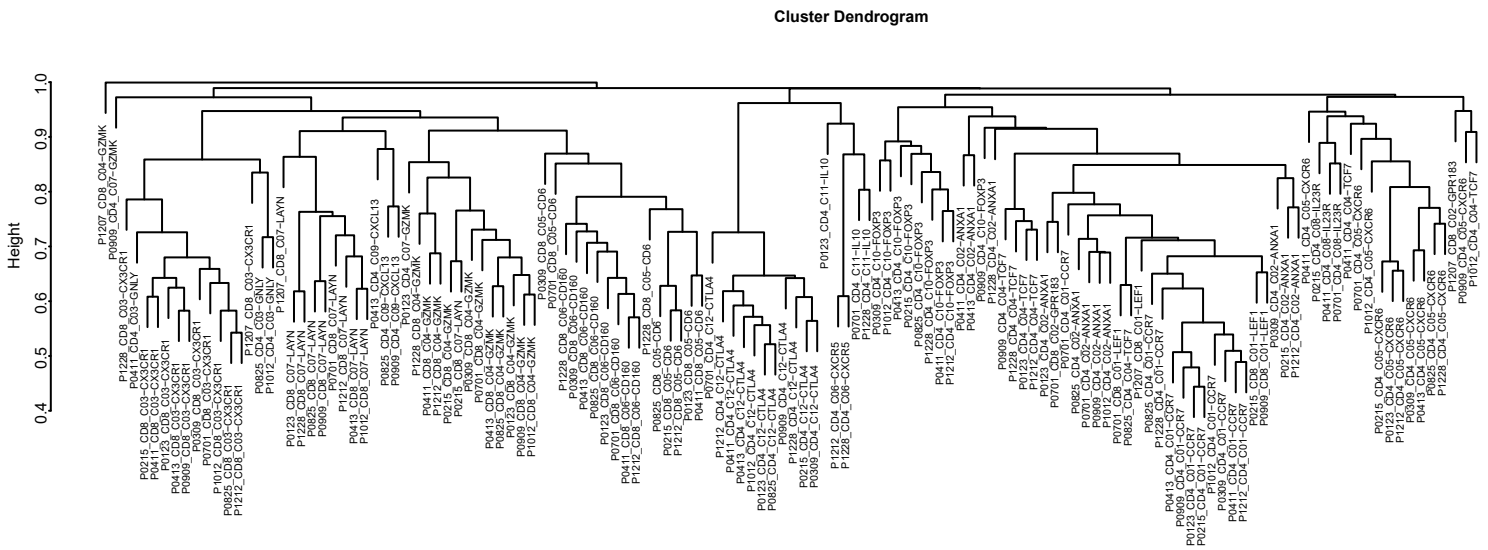

Figure S3

A

Diestrus (p7d)

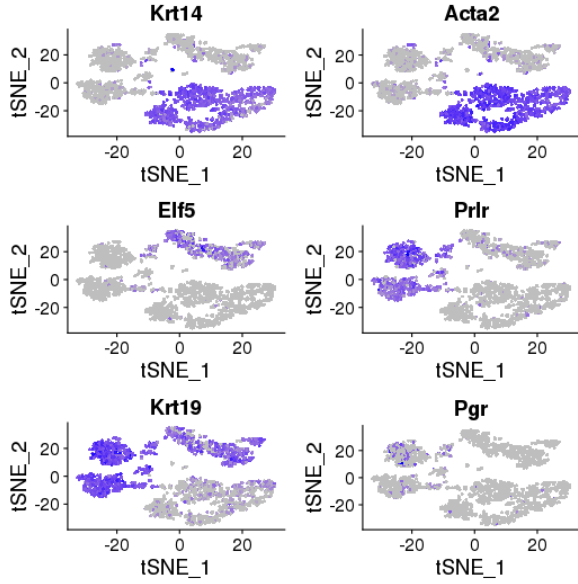

B

Estrus (p7e)

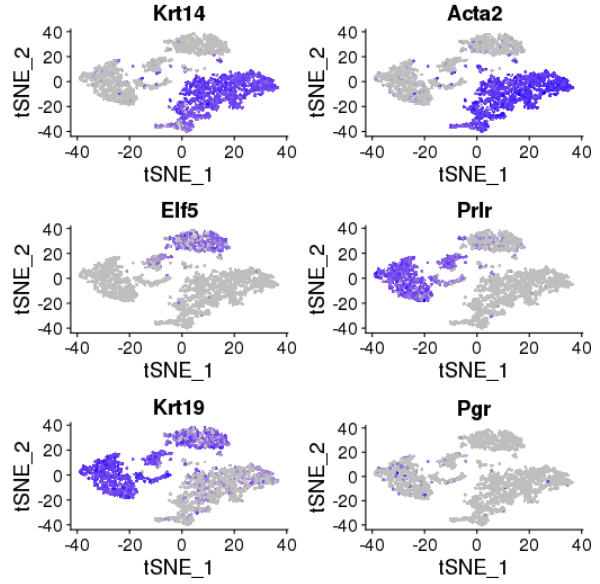

C

luminal progenitors Group1

luminal progenitors Group11, diestrus only

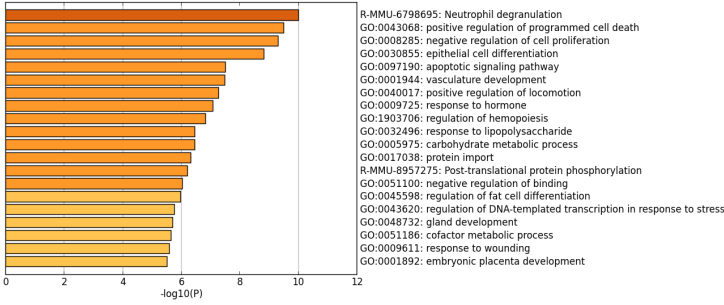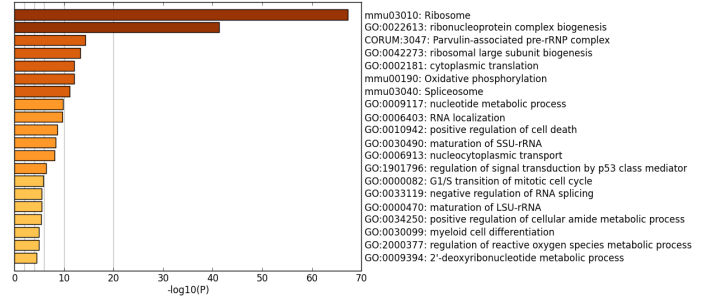

D

Basal Group 3, estrus enriched

Basal Group 7, diestrus

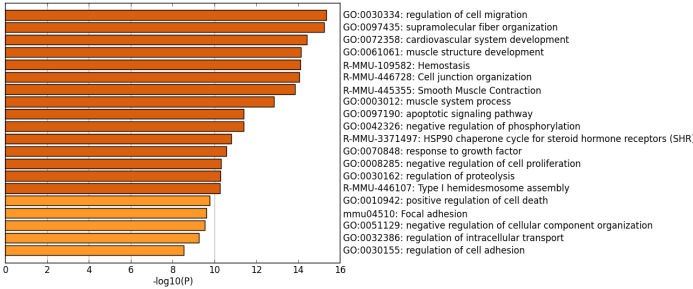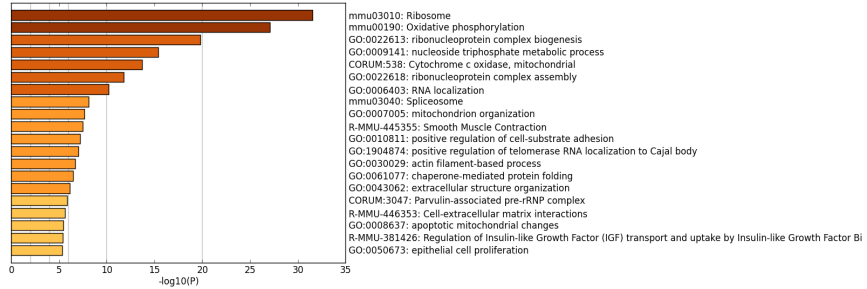

Figure S4

A CCA analysis, clustering results

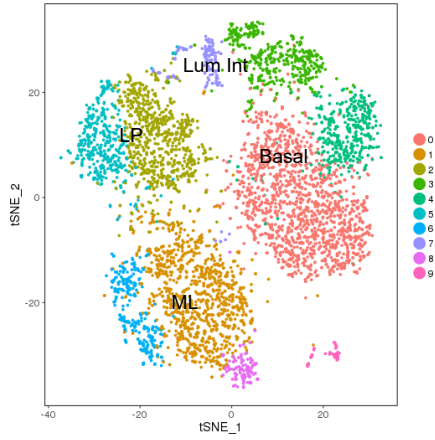

B CCA analysis, colored by sample

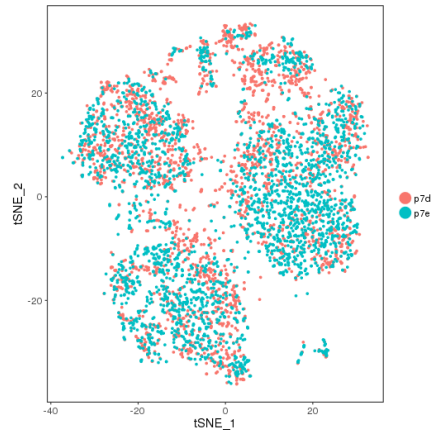

C

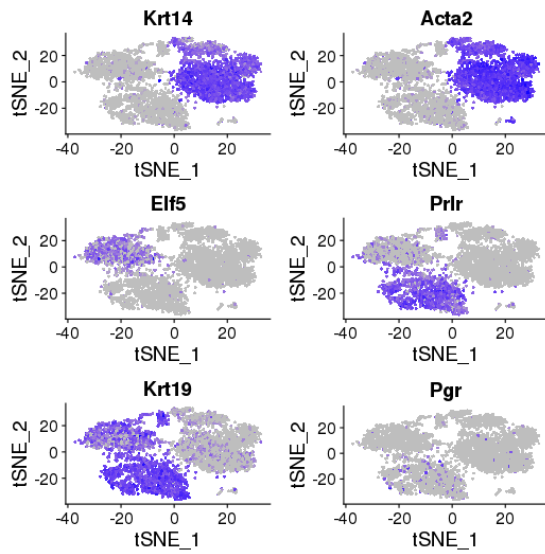

D

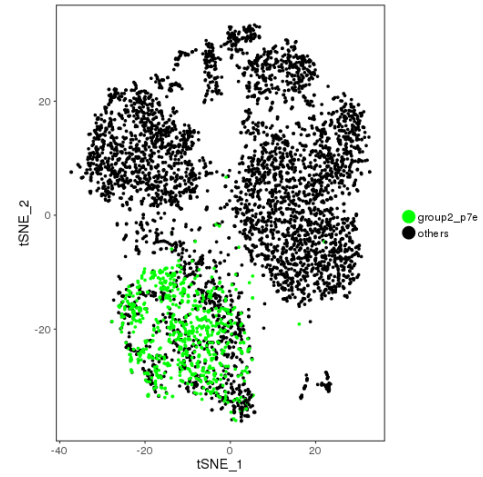

E

scmap Estrus (p7e) to Diestrus (p7d)

threshold=0.5

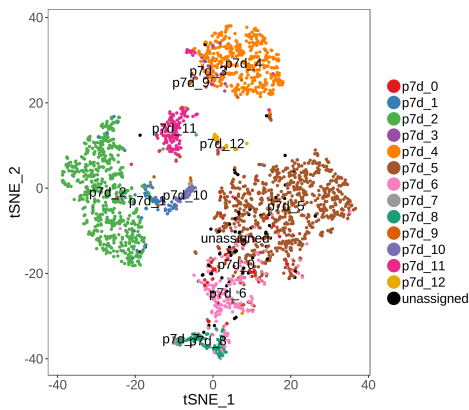

threshold=0.7

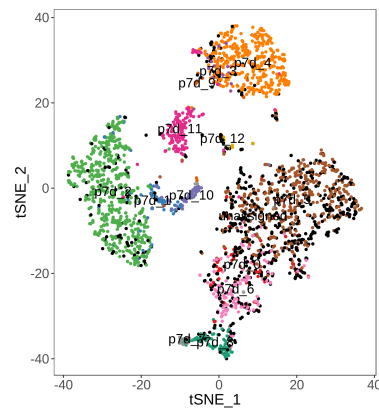

F

scmap Diestrus (p7d) to Estrus (p7e)

threshold=0.5

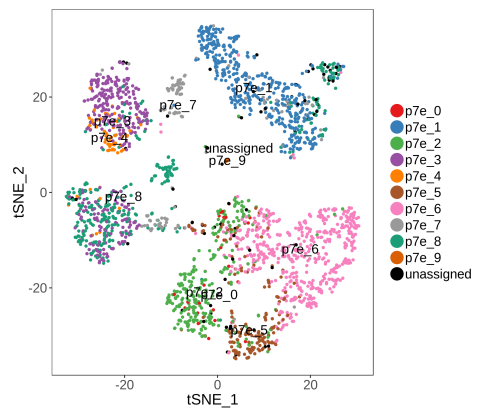

Figure S5

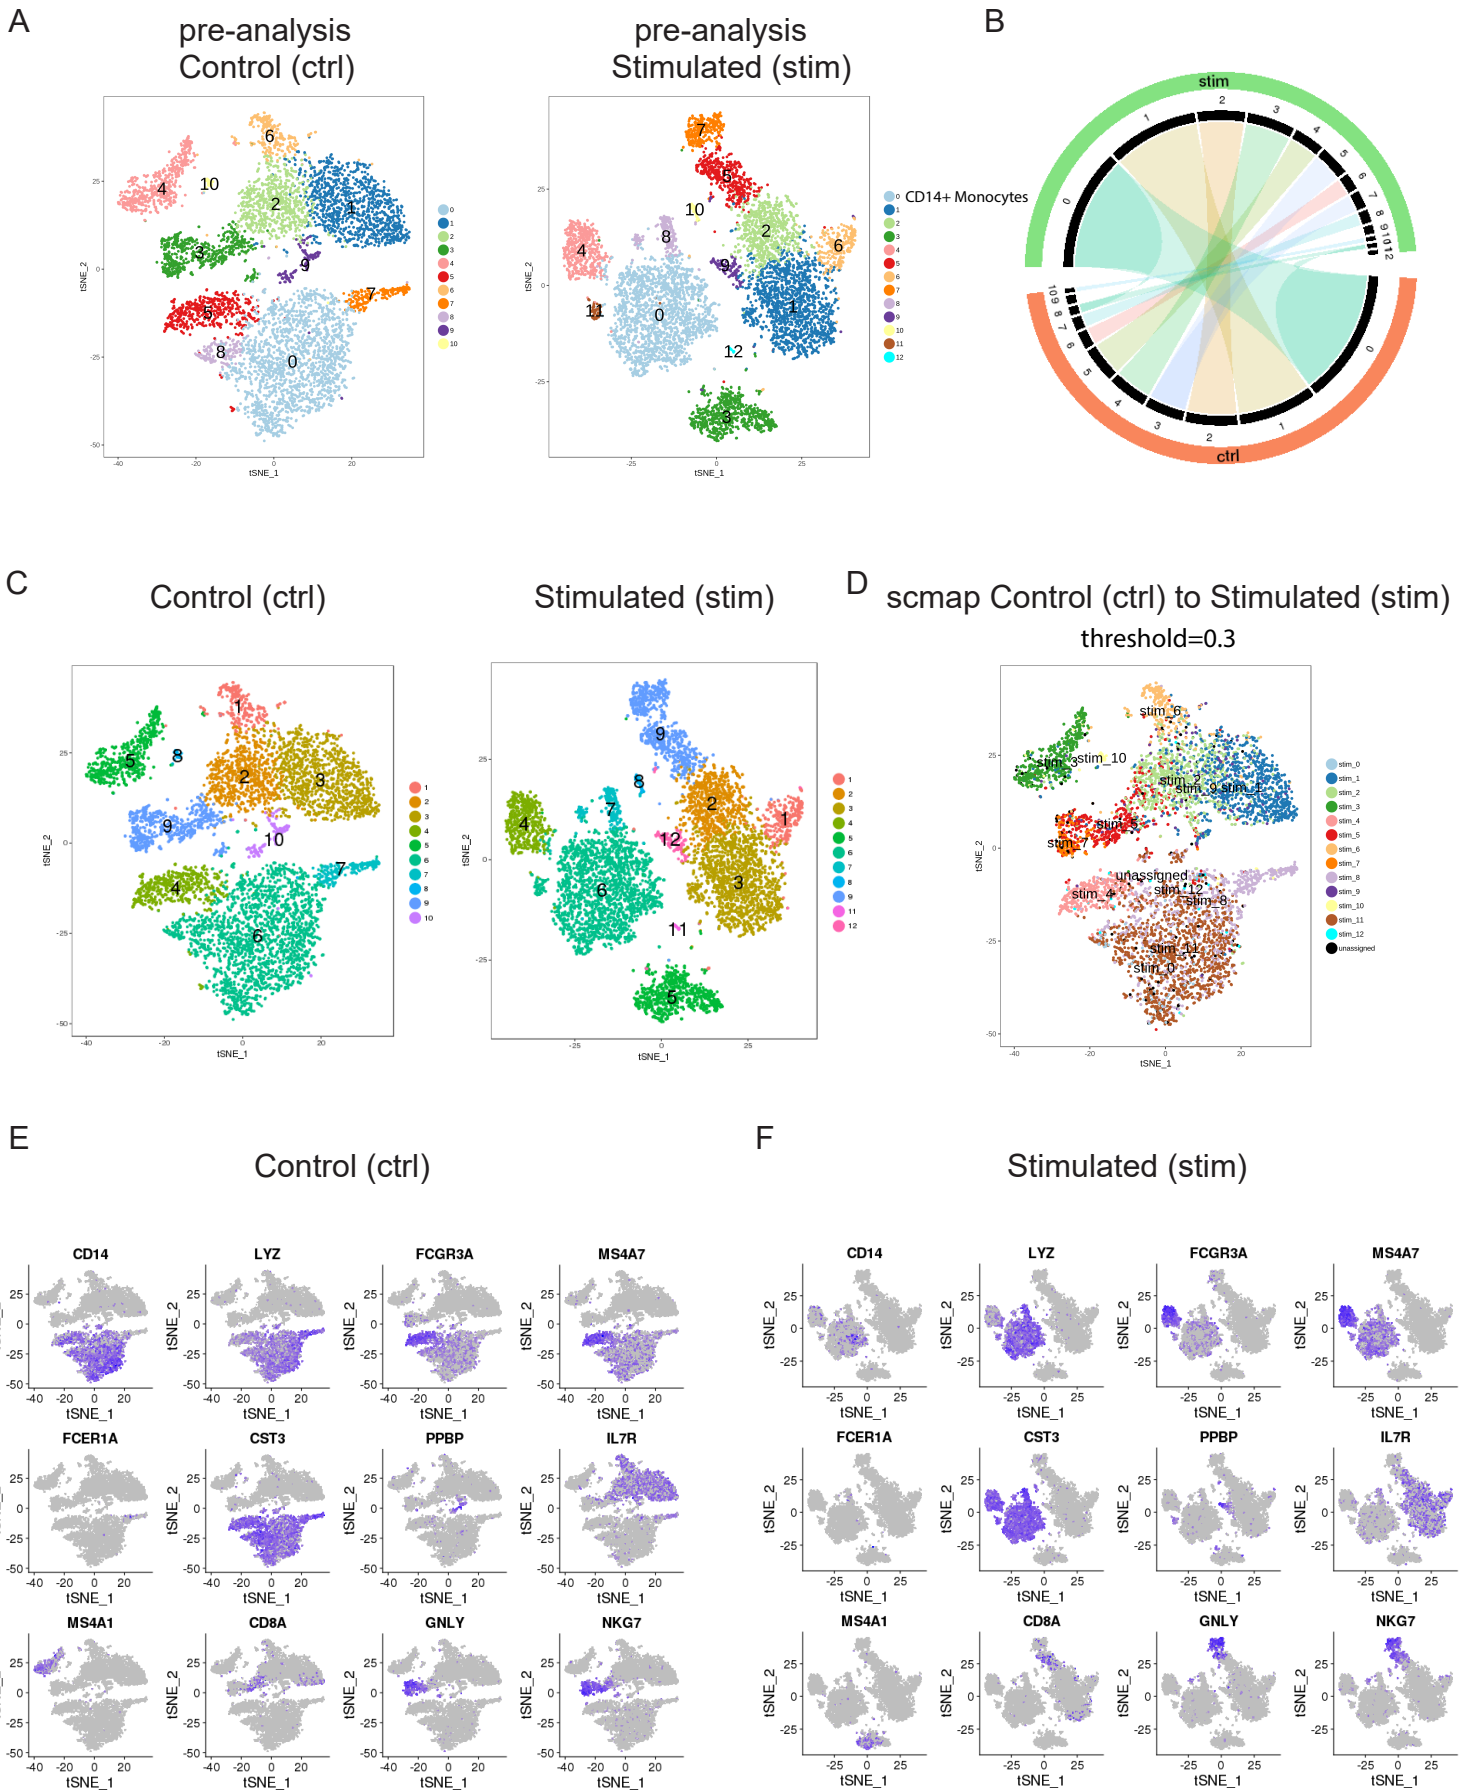

Figure S6

A

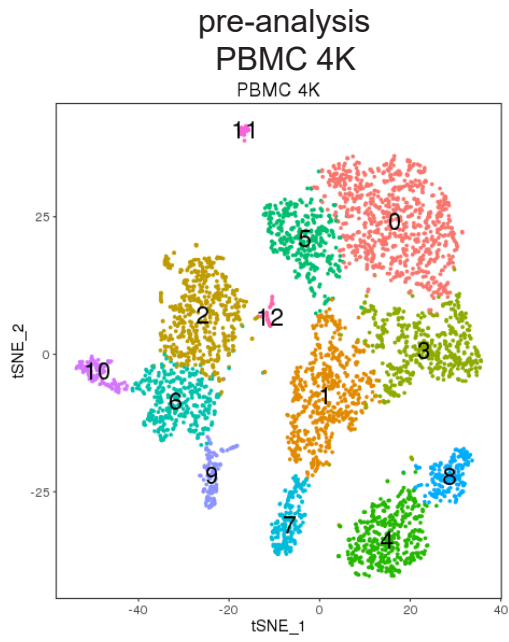

B

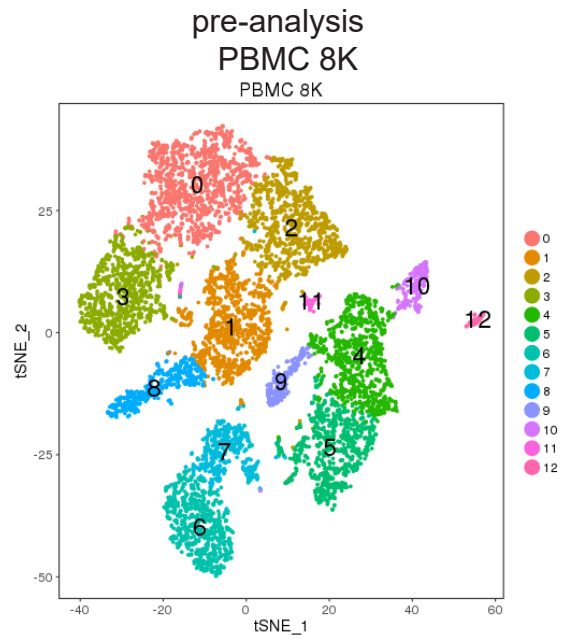

C

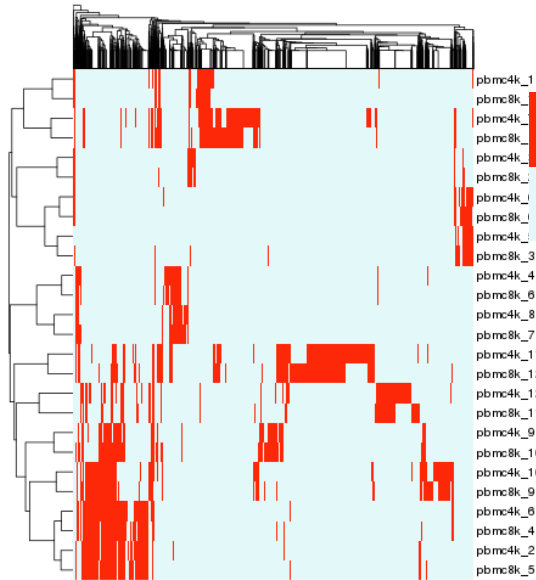

D

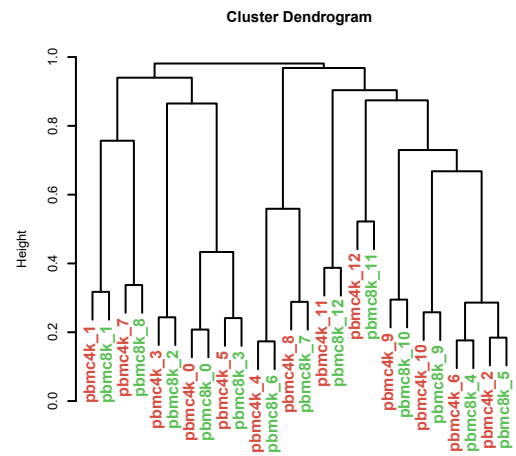

E

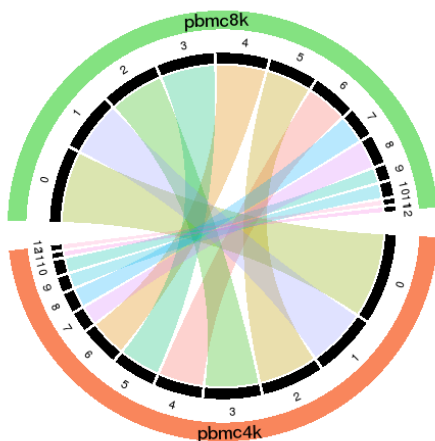

F

|    | pbmc4k    | pbmc8k    | similarity | regroup | pbmc4k_cell_perc | pbmc8k_cell_perc | pbmc8k |
|----|-----------|-----------|------------|---------|------------------|------------------|--------|
| 1  | pbmc4k_4  | pbmc8k_6  | 0.83       | 1       | 0.1              | 0.09             | -0.09  |
| 2  | pbmc4k_6  | pbmc8k_4  | 0.82       | 2       | 0.08             | 0.11             | 0.03   |
| 3  | pbmc4k_2  | pbmc8k_5  | 0.82       | 3       | 0.13             | 0.1              | -0.01  |
| 4  | pbmc4k_0  | pbmc8k_0  | 0.79       | 4       | 0.19             | 0.16             | -0.02  |
| 5  | pbmc4k_3  | pbmc8k_2  | 0.76       | 5       | 0.12             | 0.12             | -0.08  |
| 6  | pbmc4k_5  | pbmc8k_3  | 0.76       | 6       | 0.09             | 0.12             | -0.07  |
| 7  | pbmc4k_10 | pbmc8k_9  | 0.74       | 7       | 0.03             | 0.03             | -0.08  |
| 8  | pbmc4k_9  | pbmc8k_10 | 0.71       | 8       | 0.03             | 0.03             | -0.01  |
| 9  | pbmc4k_8  | pbmc8k_7  | 0.71       | 9       | 0.04             | 0.06             | 0.05   |
| 10 | pbmc4k_1  | pbmc8k_1  | 0.68       | 10      | 0.13             | 0.12             | -0.08  |
| 11 | pbmc4k_7  | pbmc8k_8  | 0.66       | 11      | 0.04             | 0.06             | 0.05   |
| 12 | pbmc4k_11 | pbmc8k_12 | 0.61       | 12      | 0.01             | 0.01             | -0.08  |
| 13 | pbmc4k_12 | pbmc8k_11 | 0.48       | 13      | 0.01             | 0.01             | -0.02  |



Figure S7

A

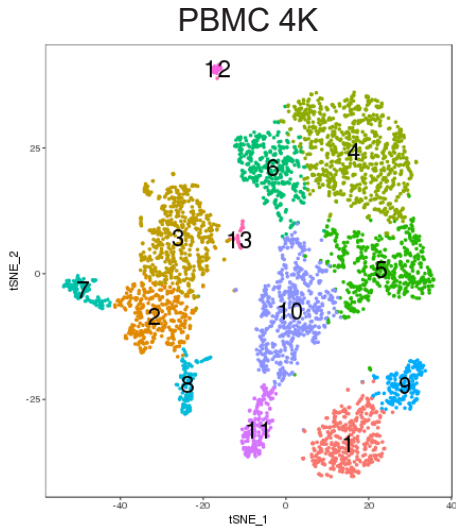

B

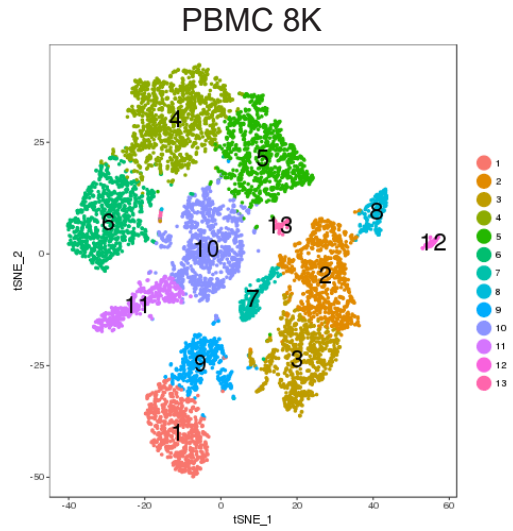

C

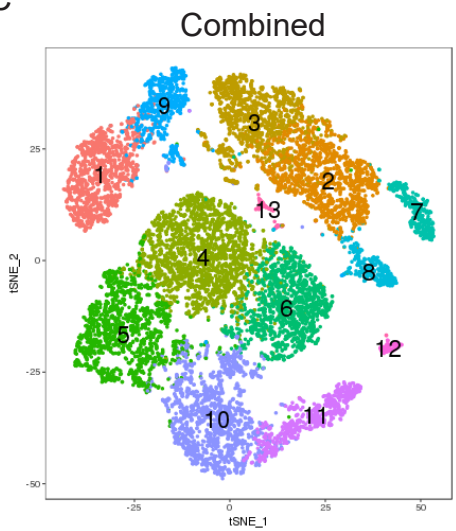

D

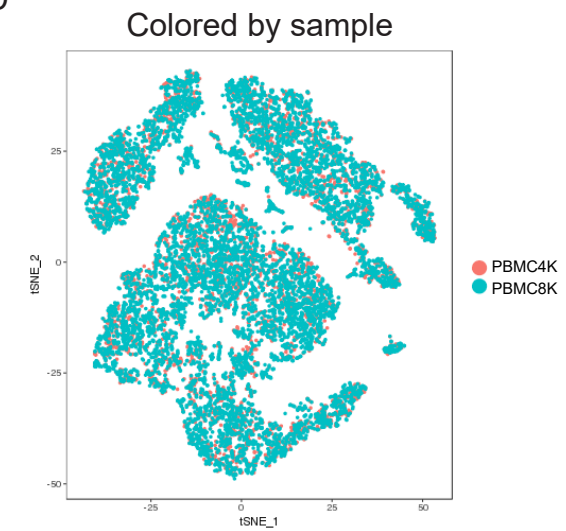

E

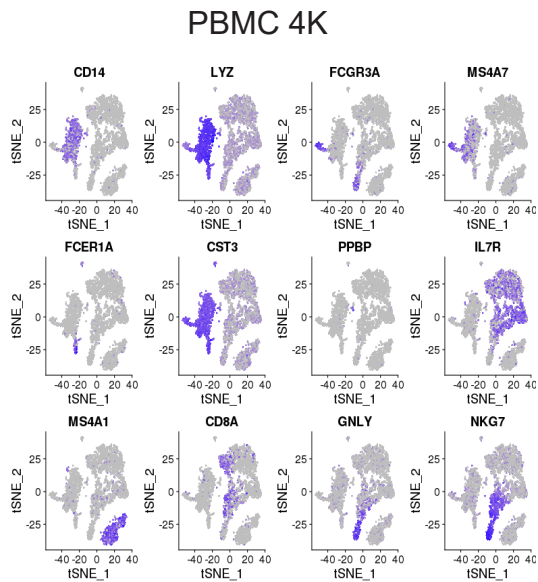

F

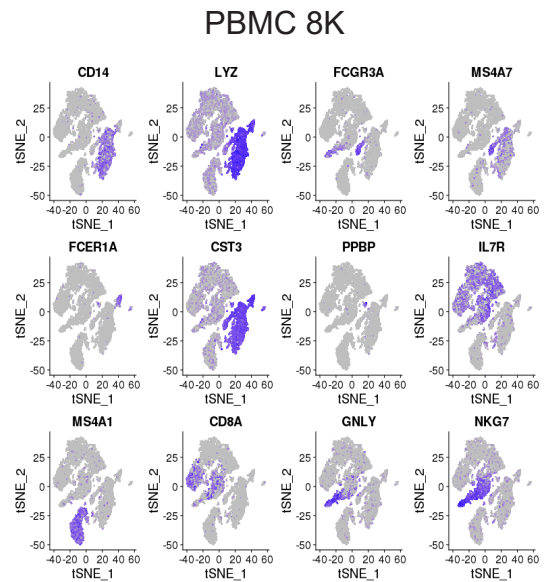

Figure S8

A

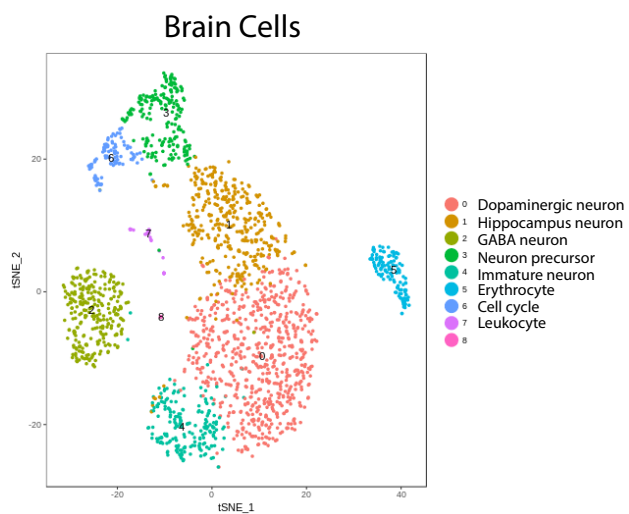

B

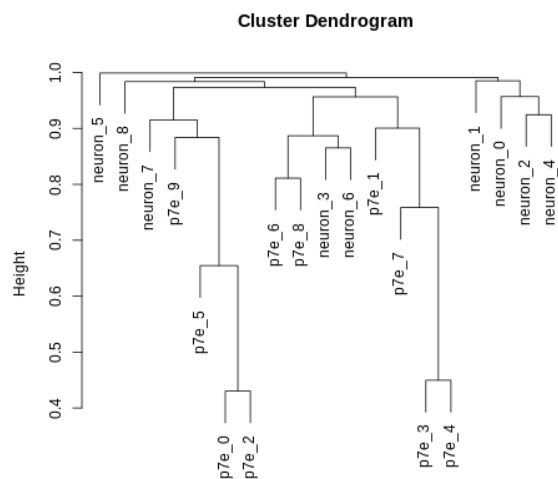

C

| neuron                              | p7e                                 | similarity | regroup |
|-------------------------------------|-------------------------------------|------------|---------|
| neuron_7                            | p7e_0;p7e_2;p7e_5;p7e_9             | 0.08       | 1       |
| neuron_3;neuron_6                   | p7e_1;p7e_3;p7e_4;p7e_6;p7e_7;p7e_8 | 0.04       | 2       |
| neuron_0;neuron_1;neuron_2;neuron_4 | NA                                  | 0.01       | 3       |
| neuron_5                            | NA                                  | NA         | 4       |
| neuron_8                            | NA                                  | NA         | 5       |

D

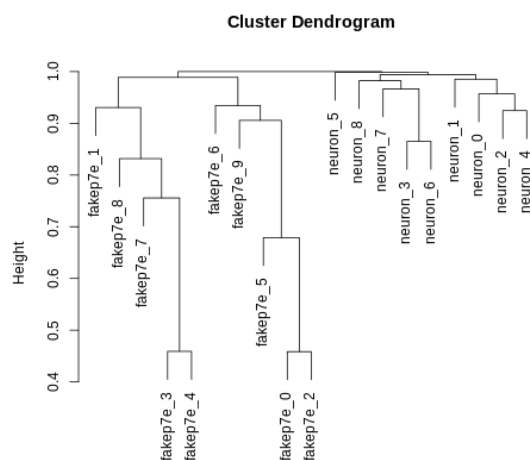

Figure S9

A

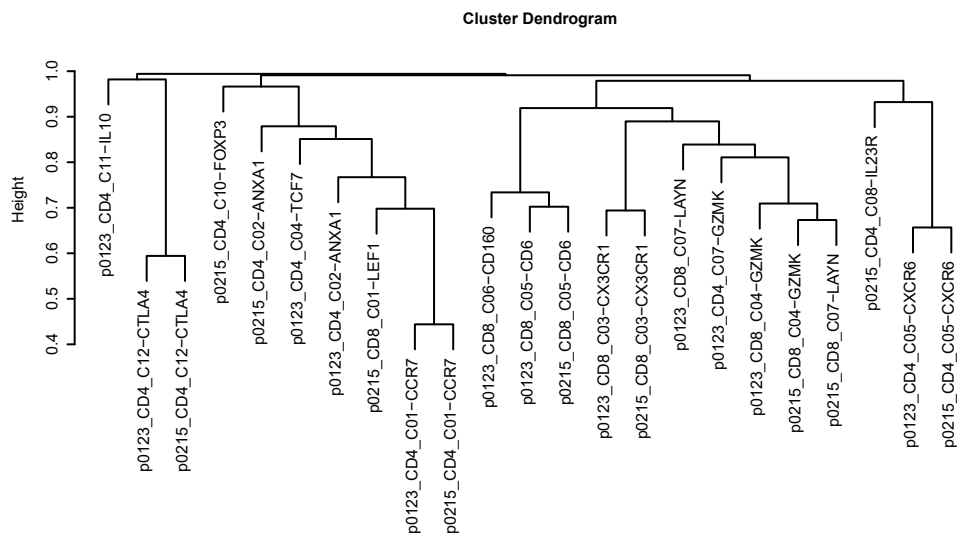

B

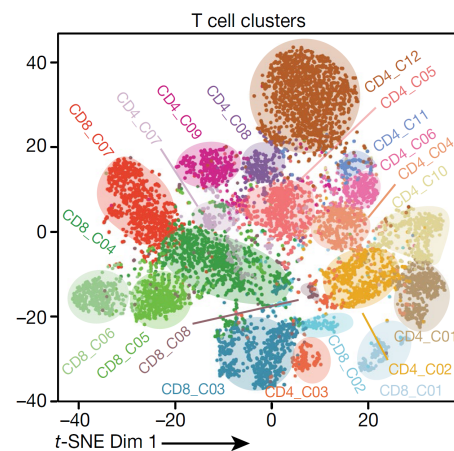

C

| p0123                                 | p0215                                 | similarity | regroup |
|---------------------------------------|---------------------------------------|------------|---------|
| p0123_CD4_C01-CCR7                    | p0215_CD4_C01-CCR7                    | 0.56       | 1       |
| p0123_CD4_C12-CTLA4                   | p0215_CD4_C12-CTLA4                   | 0.41       | 2       |
| p0123_CD4_C05-CXCR6                   | p0215_CD4_C05-CXCR6                   | 0.34       | 3       |
| p0123_CD8_C03-CX3CR1                  | p0215_CD8_C03-CX3CR1                  | 0.31       | 4       |
| p0123_CD8_C04-GZMK                    | p0215_CD8_C04-GZMK;p0215_CD8_C07-LAYN | 0.29       | 5       |
| p0123_CD8_C05-CD6;p0123_CD8_C06-CD160 | p0215_CD8_C05-CD6                     | 0.27       | 6       |
| p0123_CD4_C02-ANXA1                   | NA                                    | NA         | 7       |
| p0123_CD4_C04-TCF7                    | NA                                    | NA         | 8       |
| p0123_CD4_C07-GZMK                    | NA                                    | NA         | 9       |
| p0123_CD4_C11-IL10                    | NA                                    | NA         | 10      |
| p0123_CD8_C07-LAYN                    | NA                                    | NA         | 11      |
| NA                                    | p0215_CD4_C02-ANXA1                   | NA         | 12      |
| NA                                    | p0215_CD4_C08-IL23R                   | NA         | 13      |
| NA                                    | p0215_CD4_C10-FOXP3                   | NA         | 14      |
| NA                                    | p0215_CD8_C01-LEF1                    | NA         | 15      |

**Table S1**

|    | P0123                           | P0215                           | P0309                   | P0411                   | P0413                   | P0701                    | P0825                   | P0909                   | P1012                   | P1207 | P1212                   | P1228                   | similarity | regroup |
|----|---------------------------------|---------------------------------|-------------------------|-------------------------|-------------------------|--------------------------|-------------------------|-------------------------|-------------------------|-------|-------------------------|-------------------------|------------|---------|
| 1  | NA                              | NA                              | NA                      | NA                      | NA                      | NA                       | NA                      | NA                      | NA                      | NA    | P1212_CD4_<br>C06-CXCR5 | P1228_CD4_<br>C06-CXCR5 | 0.39       | 1       |
| 2  | NA                              | NA                              | NA                      | NA                      | NA                      | P0701_CD8_<br>C01-LEF1   | P0825_CD4_<br>C04-TCF7  | NA                      | NA                      | NA    | NA                      | NA                      | 0.37       | 2       |
| 3  | P0123_CD4_<br>C01-CCR7          | P0215_CD4_<br>C01-CCR7          | P0309_CD4_<br>C01-CCR7  | P0411_CD4_<br>C01-CCR7  | P0413_CD4_<br>C01-CCR7  | NA                       | P0825_CD4_<br>C01-CCR7  | P0909_CD4_<br>C01-CCR7  | P1012_CD4_<br>C01-CCR7  | NA    | P1212_CD4_<br>C01-CCR7  | P1228_CD4_<br>C01-CCR7  | 0.35       | 3       |
| 4  | NA                              | P0215_CD8_<br>C01-LEF1          | NA                      | NA                      | NA                      | NA                       | NA                      | P0909_CD8_<br>C01-LEF1  | NA                      | NA    | NA                      | NA                      | 0.35       | 4       |
| 5  | NA                              | NA                              | NA                      | NA                      | NA                      | P0701_CD4_<br>C02-ANXA1  | P0825_CD4_<br>C02-ANXA1 | P0909_CD4_<br>C02-ANXA1 | P1012_CD4_<br>C02-ANXA1 | NA    | NA                      | NA                      | 0.29       | 5       |
| 6  | P0123_CD4_<br>C12-CTLA4         | P0215_CD4_<br>C12-CTLA4         | P0309_CD4_<br>C12-CTLA4 | P0411_CD4_<br>C12-CTLA4 | P0413_CD4_<br>C12-CTLA4 | P0701_CD4_<br>C12-CTLA4  | P0825_CD4_<br>C12-CTLA4 | P0909_CD4_<br>C12-CTLA4 | P1012_CD4_<br>C12-CTLA4 | NA    | P1212_CD4_<br>C12-CTLA4 | P1228_CD4_<br>C12-CTLA4 | 0.27       | 6       |
| 7  | P0123_CD4_<br>C02-ANXA1         | NA                              | NA                      | NA                      | NA                      | P0701_CD8_<br>C02-GPR183 | NA                      | NA                      | NA                      | NA    | NA                      | NA                      | 0.26       | 7       |
| 8  | P0123_CD4_<br>C04-TCF7          | NA                              | NA                      | NA                      | NA                      | NA                       | NA                      | P0909_CD4_<br>C04-TCF7  | NA                      | NA    | P1212_CD4_<br>C04-TCF7  | P1228_CD4_<br>C04-TCF7  | 0.23       | 8       |
| 9  | NA                              | NA                              | NA                      | NA                      | NA                      | P0701_CD4_<br>C11-IL10   | NA                      | NA                      | NA                      | NA    | NA                      | P1228_CD4_<br>C11-IL10  | 0.2        | 9       |
| 10 | NA                              | P0215_CD4_<br>C02-ANXA1         | P0309_CD4_<br>C02-ANXA1 | NA                      | NA                      | NA                       | NA                      | NA                      | NA                      | NA    | P1212_CD4_<br>C02-ANXA1 | NA                      | 0.18       | 10      |
| 11 | P0123_CD4_<br>C07-<br>GZMK;P012 | P0215_CD8_<br>C04-<br>GZMK;P021 | P0309_CD8_<br>C04-GZMK  | P0411_CD8_<br>C04-GZMK  | P0413_CD8_<br>C04-GZMK  | P0701_CD8_<br>C04-GZMK   | P0825_CD8_<br>C04-GZMK  | P0909_CD8_<br>C04-GZMK  | P1012_CD8_<br>C04-GZMK  | NA    | P1212_CD8_<br>C04-GZMK  | P1228_CD8_<br>C04-GZMK  | 0.15       | 11      |

|    |                                       |                      |                                       |                                         |                      |                                       |                                         |                      |                                         |                      |                                       |                                       |      |    |
|----|---------------------------------------|----------------------|---------------------------------------|-----------------------------------------|----------------------|---------------------------------------|-----------------------------------------|----------------------|-----------------------------------------|----------------------|---------------------------------------|---------------------------------------|------|----|
|    | 3_CD8_C04-GZMK                        | 5_CD8_C07-LAYN       |                                       |                                         |                      |                                       |                                         |                      |                                         |                      |                                       |                                       |      |    |
| 12 | P0123_CD8_C03-CX3CR1                  | P0215_CD8_C03-CX3CR1 | P0309_CD8_C03-CX3CR1                  | P0411_CD4_C03-GNLY;P0411_CD8_C03-CX3CR1 | P0413_CD8_C03-CX3CR1 | P0701_CD8_C03-CX3CR1                  | P0825_CD4_C03-GNLY;P0825_CD8_C03-CX3CR1 | P0909_CD8_C03-CX3CR1 | P1012_CD4_C03-GNLY;P1012_CD8_C03-CX3CR1 | P1207_CD8_C03-CX3CR1 | P1212_CD8_C03-CX3CR1                  | P1228_CD8_C03-CX3CR1                  | 0.14 | 12 |
| 13 | P0123_CD8_C07-LAYN                    | NA                   | NA                                    | NA                                      | P0413_CD8_C07-LAYN   | P0701_CD8_C07-LAYN                    | P0825_CD8_C07-LAYN                      | P0909_CD8_C07-LAYN   | P1012_CD8_C07-LAYN                      | P1207_CD8_C07-LAYN   | P1212_CD8_C07-LAYN                    | P1228_CD8_C07-LAYN                    | 0.14 | 13 |
| 14 | NA                                    | NA                   | NA                                    | P0411_CD4_C02-ANXA1                     | P0413_CD4_C02-ANXA1  | NA                                    | NA                                      | NA                   | NA                                      | NA                   | NA                                    | NA                                    | 0.13 | 14 |
| 15 | P0123_CD8_C05-CD6;P0123_CD8_C06-CD160 | P0215_CD8_C05-CD6    | P0309_CD8_C05-CD6;P0309_CD8_C06-CD160 | P0411_CD8_C05-CD6;P0411_CD8_C06-CD160   | P0413_CD8_C06-CD160  | P0701_CD8_C05-CD6;P0701_CD8_C06-CD160 | P0825_CD8_C05-CD6;P0825_CD8_C06-CD160   | NA                   | NA                                      | NA                   | P1212_CD8_C05-CD6;P1212_CD8_C06-CD160 | P1228_CD8_C05-CD6;P1228_CD8_C06-CD160 | 0.13 | 15 |
| 16 | NA                                    | NA                   | NA                                    | NA                                      | P0413_CD4_C09-CXCL13 | NA                                    | P0825_CD4_C09-CXCL13                    | P0909_CD4_C09-CXCL13 | NA                                      | NA                   | NA                                    | NA                                    | 0.12 | 16 |
| 17 | NA                                    | P0215_CD4_C10-FOXP3  | P0309_CD4_C10-FOXP3                   | P0411_CD4_C10-FOXP3                     | P0413_CD4_C10-FOXP3  | NA                                    | P0825_CD4_C10-FOXP3                     | NA                   | P1012_CD4_C10-FOXP3                     | NA                   | P1212_CD4_C10-FOXP3                   | P1228_CD4_C10-FOXP3                   | 0.11 | 17 |
| 18 | NA                                    | P0215_CD4_C08-IL23R  | NA                                    | P0411_CD4_C08-IL23R                     | NA                   | P0701_CD4_C08-IL23R                   | NA                                      | NA                   | NA                                      | NA                   | NA                                    | NA                                    | 0.11 | 18 |
| 19 | P0123_CD4_C05-CXCR6                   | P0215_CD4_C05-CXCR6  | P0309_CD4_C05-CXCR6                   | P0411_CD4_C04-TCF7                      | P0413_CD4_C05-CXCR6  | P0701_CD4_C05-CXCR6                   | P0825_CD4_C05-CXCR6                     | NA                   | P1012_CD4_C05-CXCR6                     | NA                   | P1212_CD4_C05-CXCR6                   | P1228_CD4_C05-CXCR6                   | 0.08 | 19 |
| 20 | NA                                    | NA                   | NA                                    | NA                                      | NA                   | NA                                    | NA                                      | P0909_CD4_C05-CXCR6  | P1012_CD4_C04-TCF7                      | P1207_CD8_C02-GPR183 | NA                                    | NA                                    | 0.05 | 20 |

|    |                        |    |    |                         |    |                        |    |                         |    |                        |    |                         |    |    |
|----|------------------------|----|----|-------------------------|----|------------------------|----|-------------------------|----|------------------------|----|-------------------------|----|----|
| 21 | P0123_CD4_<br>C11-IL10 | NA | NA | NA                      | NA | NA                     | NA | NA                      | NA | NA                     | NA | NA                      | NA | 21 |
| 22 | NA                     | NA | NA | P0411_CD4_<br>C05-CXCR6 | NA | NA                     | NA | NA                      | NA | NA                     | NA | NA                      | NA | 22 |
| 23 | NA                     | NA | NA | NA                      | NA | P0701_CD4_<br>C01-CCR7 | NA | NA                      | NA | NA                     | NA | NA                      | NA | 23 |
| 24 | NA                     | NA | NA | NA                      | NA | NA                     | NA | P0909_CD4_<br>C07-GZMK  | NA | NA                     | NA | NA                      | NA | 24 |
| 25 | NA                     | NA | NA | NA                      | NA | NA                     | NA | P0909_CD4_<br>C10-FOXP3 | NA | NA                     | NA | NA                      | NA | 25 |
| 26 | NA                     | NA | NA | NA                      | NA | NA                     | NA | NA                      | NA | P1207_CD8_<br>C01-LEF1 | NA | NA                      | NA | 26 |
| 27 | NA                     | NA | NA | NA                      | NA | NA                     | NA | NA                      | NA | P1207_CD8_<br>C04-GZMK | NA | NA                      | NA | 27 |
| 28 | NA                     | NA | NA | NA                      | NA | NA                     | NA | NA                      | NA | NA                     | NA | P1228_CD4_<br>C02-ANXA1 | NA | 28 |
